# Supplementary material for: Long-lived charge traps in functionalized pentacene and anthradithiophene studied by time-resolved electric force microscopy
Source: Royal Society of Chemistry journal article supplement (doi:10.1039/b902880c), 2009-01-01
Supplement: b902880c.pdf [file b902880c.pdf]

## SUPPLEMENT TO

# Long-lived charge traps in functionalized pentacene and anthradithiophene studied by time-resolved electric force microscopy

Michael J. Jaquith,<sup>1</sup> John E. Anthony,<sup>2</sup> and John A. Marohn<sup>1,\*</sup>

<sup>1</sup>*Department of Chemistry and Chemical Biology, Cornell University, Ithaca, New York 14853-1301*

<sup>2</sup>*Department of Chemistry, University of Kentucky, Lexington, Kentucky 40506-0055*

(Dated: May 12, 2009)

### Topography

For topographic imaging, the cantilever was excited by a resonance frequency sine wave having an amplitude of approximately 50 mV<sub>rms</sub> delivered by the RHK PLLPRO. This sine wave was applied to a piezoelectric element mounted beneath the cantilever,<sup>1</sup> resulting in a cantilever amplitude of 328 nm<sub>pp</sub> (a full interferometric fringe).

The output of the RHK PLLPRO that is proportional to the cantilever amplitude was input into a commercial proportional-integral-derivative (PID) feedback controller (Stanford Research Systems, Model no. SIM960). This PID controller was used to adjust the height of the cantilever above the sample by applying a potential to a custom-fabricated slip-stick nanopositioner<sup>1,2</sup> onto which the cantilever was affixed, as follows. The output of the PID controller was amplified by a commercial high-voltage amplifier (ThorLabs 3-Axis Piezo Controller, model no. MDT693; gain  $G = 15$ ) before being sent to drive the piezo element of the nanopositioner. The extension constant of nanopositioner was 30 nm/V, resulting in a total extension constant, as viewed from the output of the PID, of 450 nm/V.

Images of topography were obtained as follows. The cantilever was advanced towards the surface until its amplitude dropped to a setpoint of 0.82 of the full amplitude. This corresponds to an amplitude of 268 nm<sub>pp</sub> = 0.82 × 328 nm<sub>pp</sub>. The sample was scanned laterally, and during the scan the PID compared the instantaneous amplitude to a set value (stored internally in the PIS) and supplied a voltage to the nanopositioner in order to keep the cantilever amplitude at the setpoint. To achieve this, the PID was programmed as follows: P=−0.1 OFF, I=500 s<sup>−1</sup> ON, D=5 × 10<sup>−4</sup> s ON, Internal Setpoint = 4.5 V. These constants were determined, by trial and error, to give stable feedback with rapid time response. The output of the PID was recorded by a commercial A/D converter (National Instruments DAQ board, model no. NI PCI-6259) controlled by Labview running in Windows XP. The sample height is computed from the PID output voltage by multiplying by 450 nm/V.

The root-mean-square surface roughness ( $R_{\text{rms}}$ ) was determined using

$$R_{\text{rms}} = \sqrt{\frac{1}{n} \sum_{i=1}^n (z_i - \bar{z})^2} \quad (1)$$

where  $z_i$  are the height points,  $\bar{z}$  is the average height of the image, and  $n$ , equal to 128 × 128 typically, is the total number

of height points. Before applying Eq. 1, a plane correction was applied to the height points to account for sample tilt.

### Imaging the Distribution of Trapped Charge

The gate bias was applied with a Keithley 6430 sub-femtoamp remote sourcemeter. The images in Figs. 2(b-d), 3(b), 4(b), and 5(b) have 128 × 128 points and take 5 minutes to acquire.

### Trap Formation Rate

The protocol for measuring the rate of charge trap formation was essentially the same as described in Ref.3. By replacing a slow commercial frequency counter with the RHK PLLPRO frequency demodulator, however, we have been able to reduce the time required to quantify the local electrostatic potential from 5 minutes to 2 seconds, a 150-fold improvement.

In fitting the trap density to Eq. 3 in the manuscript, the best fit parameters and their relative error were determined using the Matlab Fit function.

### References

\* Email:jam99@cornell.edu

<sup>1</sup> E. M. Muller, *Electric Force Microscopy of Charge Trapping in Thin-Film Pentacene Transistors*, Ph. D. Thesis, Cornell University, New York, 2005.

<sup>2</sup> W. Silveira and J. Marohn, *Rev. Sci. Instrum.*, 2003, **74**, 267, [url].

<sup>3</sup> M. Jaquith, E. Muller, and J. Marohn, *J. Phys. Chem. B*, 2007, **111**, 7711, [url].
